# Supplementary material for: Mutations in Arabidopsis YCF20-like genes affect thermal dissipation of excess absorbed light energy
Source: PubMed Central journal article supplement — Planta. 2010 Jan 20;231(4):923–37. doi: 10.1007/s00425-010-1098-9 (PMC2820688; doi:10.1007/s00425-010-1098-9), 2010-01-20
Supplement: 425_2010_1098_MOESM1_ESM.pdf [file 425_2010_1098_MOESM1_ESM.pdf]

## Supplementary Material to

# Mutations in Arabidopsis YCF20-like genes affect thermal dissipation of excess absorbed light energy

Hou-Sung Jung · Krishna K. Niyogi

[At5g43050](#)  
[At1g65420](#)

Arabidopsis eFP Browser at bar.utoronto.ca  
Winter *et al.*, 2007. PLoS One 2(8): e718  
Data from Laubinger *et al.* (2008) Genome Biol. 9:R112

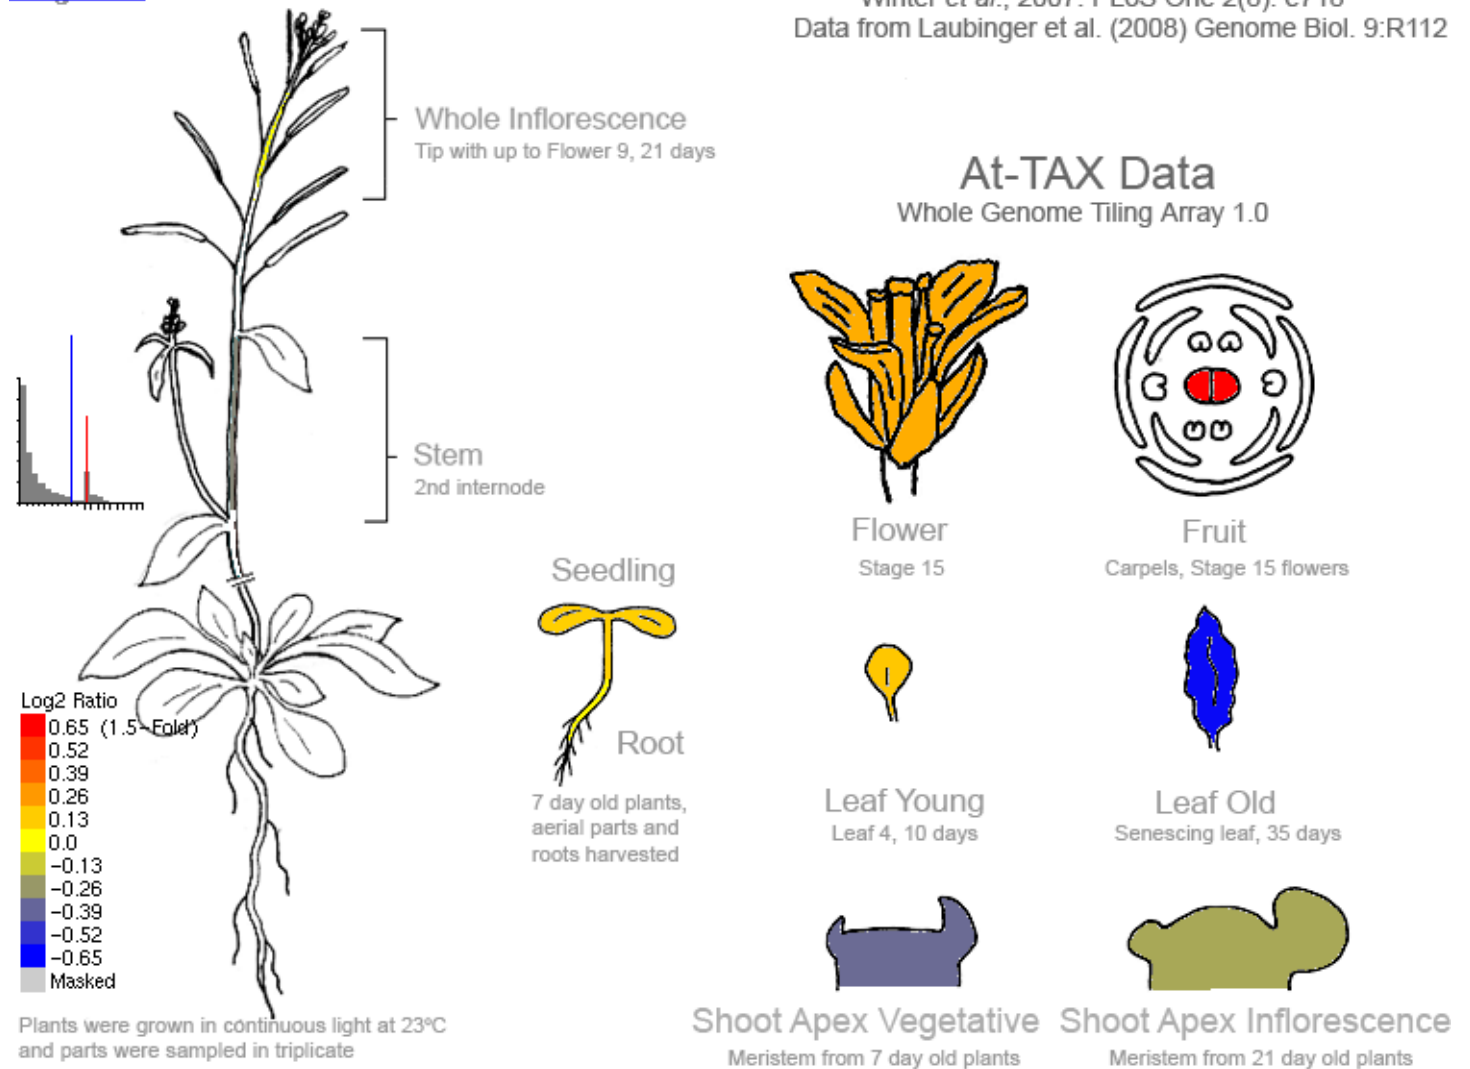

**Suppl. Fig. 1.** Differential expression levels of *NPQ6* and *NPQ7* during plant development. Red and blue indicated higher expression levels of *NPQ6* and *NPQ7*, respectively. Similar expression levels between *NPQ6* and *NPQ7* are marked as yellow. This figure was generated from the Arabidopsis eFP browser (<http://bbc.botany.utoronto.ca/efp/cgi-bin/efpWeb.cgi>) using Developmental map AT-TAX.
